# Supplementary material
Source: Springer Nature journal article supplement (https://www.springermedizin.de/resource/supplementary/12933_2011_461_MOESM2_ESM.pdf/9538530)

A. Amputation rate in diabetic and nondiabetic patients from the catchment area of KS.

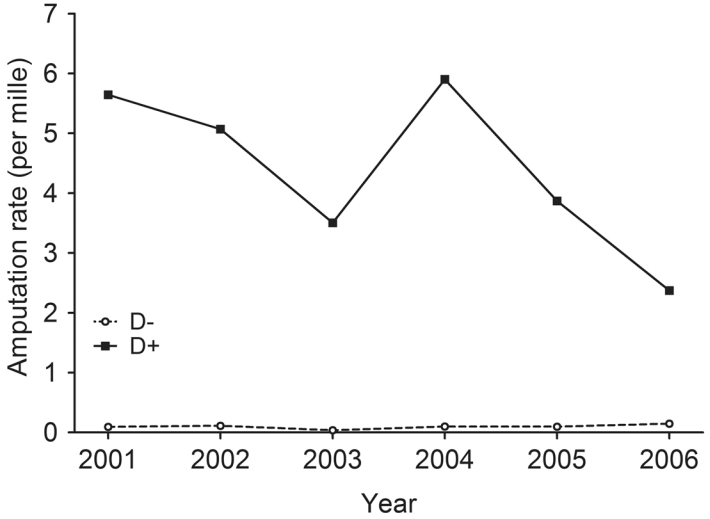

B. Amputation rate in diabetic patients from the catchment area of KS.

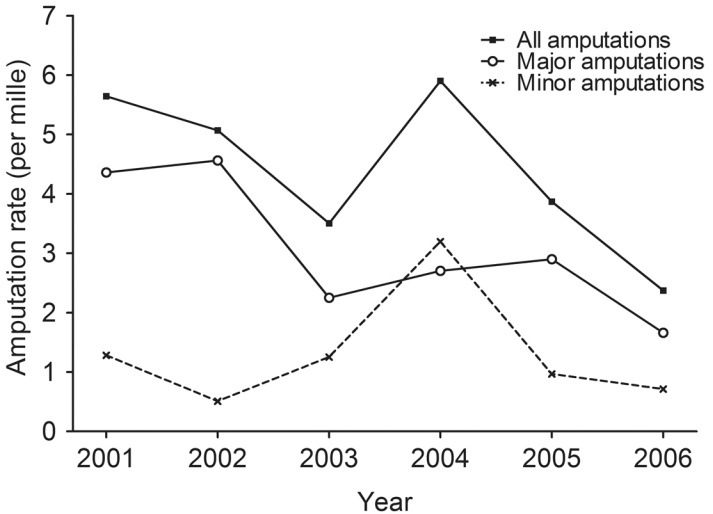

Supplement: MOESM2 [file 9538530]
